# Supplementary material for: Impact of prenatal stress on the dyadic behavior of mothers and their 6-month-old infants during a play situation: role of different dimensions of stress
Source: Springer Nature journal article supplement (doi:10.1007/s00702-017-1770-3), 2017-07-29
Supplement: MOESM1 [file 13337316]

**Electronic Supplementary Material**

**Impact of prenatal stress on the dyadic behavior of mothers and their 6-month-old infants during a play situation: Role of different dimensions of stress.**

Isabell Ann-Cathrin Wolf1, Maria Gilles1, Verena Peus1, Barbara Scharnholz1, Julia Seibert2, Christine Jennen-Steinmetz3, Bertram Krumm3, Michael Deuschle1*, Manfred Laucht4,5*

*shared last authors; 1 Department of Psychiatry and Psychotherapy, Central Institute of Mental Health, Medical Faculty Mannheim, University of Heidelberg, Germany; 2 Clinic for General Psychiatry, Center for Psychosocial Medicine, Heidelberg University Hospital, University of Heidelberg, Germany; 3 Department of Biostatistics, Central Institute of Mental Health, Medical Faculty Mannheim, University of Heidelberg, Germany; 4 Department of Child and Adolescent Psychiatry and Psychotherapy, Central Institute of Mental Health, Medical Faculty Mannheim, University of Heidelberg, Germany and 5 Department of Psychology, University of Potsdam, Germany

Correspondence to: Prof. Dr. Manfred Laucht, Department of Child and Adolescent Psychiatry and Psychotherapy, Central Institute of Mental Health, Medical Faculty Mannheim / Heidelberg University, J 5, 68159 Mannheim, Germany, Telephone +49 621/1703-4903, Fax +49 621/1703-1205, e-mail: manfred.laucht@zi.mannheim.de

**Supplement S1: Assessment of the stress indices**

Mothers-to-be (N = 410) were assessed in the last trimester of pregnancy using a structured interview and a series of questionnaires in order to collect information concerning a broad range of environmental and sociodemographic risk factors, prenatal medical risk factors, general medical characteristics, and psychosocial risk factors. Eight main stressor variables derived from eight different questionnaires were selected to represent a variety of prenatal adversities, yielding three different dimensions of stress: a) maternal psychopathology (primarily depressive and anxiety symptoms); b) perceived stress; and c) socioeconomic and psychosocial stress. The composite score of psychopathology was derived from three questionnaires (Edinburgh Postnatal Depression Scale (EPDS) (Cox et al. 1987); State-Trait Anxiety inventory (STAIT/S) (Spielberger et al. 1983); Anxiety Screening Questionnaire (ASQ) (Wittchen and Boyer 1998), and the Mini International Neuropsychiatric Interview (MINI) (Sheehan et al. 1998) indicating current depression or anxiety disorder. The composite score perceived stress was derived from the Perceived Stress Scale (PSS) (Cohen et al. 1983) and the Prenatal Distress Questionnaire (PDQ) (Yali and Lobel 1999). The composite measure of socioeconomic and psychosocial stress was obtained from the Life Experiences Survey (LES) (Sarason et al. 1978), which scores for negative life events, and the Social Support Questionnaire (Soz-U) (Fydrich et al. 2007). Furthermore, the interview scores for the categories living without a partner, encouragement through partner, separation(s) in the last year, daily arguments, physical conflicts within the preceding 12 months, the composition of the household (e.g. rooms per person), no academic qualification, no professional education, monthly income per household less than 1,750 Euro and debt were included in the psychosocial stress axis (positively-impacting data were inverted; for detailed record see Dukal et al. (2015). In addition, an “adversity score” was calculated by summing up the number of dichotomous stressful prenatal adverse conditions and environmental circumstances. To obtain a homogeneous composite measure of prenatal stress, a principal component analysis (PCA) was performed. This involved the eight main stressor variables and the total adversity score as a ninth main variable. This analysis yielded a first principal component (PC1), which explained around 60% of the common variance.

**Supplement S2: Supplementary analysis with extended covariates**

**Rationale**: In order to adjust for a broader set of covariates (mother’s age, infant gender, parity, breastfeeding, Apgar score after 5’, perinatal complication, maternal depression before birth and current stress at six months postpartum), further analyses were conducted.

**Psychosocial PS:**

Computed analyses with all covariates still showed a main effect in the IposMpos dyad (F(1,138) = 7.827, p = .006, partial η2 = .054). No main effects of psychosocial PS occurred for IproMpos or IproMneg dyads when adjusting for all covariates (all p > .05; see Appendix Table 3).

**Table legends:**

**Supplement Table 3.** Pearson correlations of the stress indices and the cortisol indices, and the Perceived Stress Scale (PSS) six months after birth.

**Supplement Table 4.** Effect of PS on mother-infant dyadic behavior (means, standard deviations and results of ANCOVAs additionally adjusted for breastfeeding, maternal depression before birth (except for psychopathological PS), Apgar score after 5’, perinatal complications, current perceived stress) in the high-stressed (H) and low-stressed (L) groups.

**Supplement**

**Table 3**

Table 3. **Pearson correlations between the prenatal psychosocial stress and psychophysiological stress indices, and the Perceived Stress Scale (PSS) six months after birth.**

|  | **Perceived PS** | **Psychosocial PS** | **Cortisol Slope T1** | **Cortisol AuCg T1** | **PSS six months after birth** |
| --- | --- | --- | --- | --- | --- |
| **Psychopathological PS** | .721;  p < .001;  N = 134 | .629;  p < .001;  N = 134 | - .203;  p = .019;  N = 127 | - .061;  p = .491;  N = 131 | .609;  p < .001;  N = 150 |
| **Perceived PS** | 1 | .582;  p < .001;  N = 134 | - .003;  p = .974;  N = 127 | .081;  p = .360;  N = 131 | .693;  p < .001;  N = 150 |
| **Psychosocial PS** |  | 1 | - .184;  p = .033;  N = 127 | - .013;  p = .879;  N = 131 | .473;  p < .001;  N = 150 |
| **Cortisol slope T1** |  |  | 1 | - .398;  p < .001;  N = 131 | .032;  p = .723;  N = 124 |
| **Cortisol AuCg T1** |  |  |  | 1 | - .053;  .562;  N = 122 |

**Abbreviations: AuCg: Area under the curve with respect to the ground; PS: prenatal stress; PSS: Perceived Stress Scale.**

**Supplement**

**Table 4**

Table 4. **Effect of PS on mother-infant dyadic behavior (means, standard deviations and results of ANCOVAs additionally adjusted for breastfeeding, maternal depression before birth (except for psychopathological ELS), Apgar score after 5’, perinatal complications, current perceived stress) in the high-stressed (H) and low-stressed (L) groups.**

|  | **IposMpos dyad** | | | |  | **IproMpos dyad** | | | |  | **IproMneg dyad** | | | |
| --- | --- | --- | --- | --- | --- | --- | --- | --- | --- | --- | --- | --- | --- | --- |
|  | M | SD | F/ (dfs) | p |  | M | SD | F/ (dfs) | p |  | M | SD | F/ (dfs) | p |
| **Psychopathological PS** | H: 5.72  L: 4.73 | 4.10  4.78 | 0.002  (1,139) | .960 |  | H: 1.46  L: 1.79 | 3.30  4.29 | 1.051  (1,139) | .307 |  | H: 0.49  L: 0.30 | 1.73  0.97 | 1.069  (1,139) | .303 |
| **Perceived PS** | H: 6.19  L: 4.24 | 4.40  4.36 | 2.240  (1,138) | .137 |  | H: 1.10  L: 2.15 | 2.79  4.60 | 0.012  (1,138) | .912 |  | H: 0.46  L: 0.32 | 1.71  0.98 | 0.774  (1,138) | .380 |
| **Psychosocial PS** | H: 6.58  L: 3.95 | 4.51  4.08 | 7.827  (1,138) | .006 |  | H: 0.96  L: 2.24 | 2.55  4.65 | 0.337  (1,138) | .563 |  | H: 0.41  L: 0.38 | 1.61  1.17 | 0.032  (1,138) | .858 |
| **Physiological PS** | M | SD | F/ (dfs) | p |  | M | SD | F/ (dfs) | p |  | M | SD | F/ (dfs) | p |
| **Cortisol slope** | H: 5.04  L: 5.41 | 4.70  4.07 | 0.015  (1,112) | .903 |  | H: 1.51  L: 1.59 | 3.62  3.93 | 0.090  (1,112) | .765 |  | H: 0.26  L: 0.63 | 0.79  2.00 | 1.971  (1,112) | .163 |
| **Cortisol AuCg** | H: 5.56  L: 5.05 | 5.07  3.69 | 0.170  (1,110) | .681 |  | H: 1.52  L: 1.62 | 3.71  3.88 | 0.012  (1,110) | .914 |  | H: 0.31  L: 0.57 | 0.93  1.91 | 0.266  (1,110) | .607 |

All means and standard deviations are percentages. Abbreviations: PS: prenatal stress; Infant positive-mother positive: IposMpos; Infant protesting-mother positive: IproMpos; Infant protesting-mother negative: IproMneg, Area under the curve with respect to the ground: AuCg.

**References**

Cohen S, Kamarck T, Mermelstein R (1983) A global measure of perceived stress Journal of health and social behavior 24:385-396

Cox JL, Holden JM, Sagovsky R (1987) Detection of postnatal depression. Development of the 10-item Edinburgh Postnatal Depression Scale The British journal of psychiatry : the journal of mental science 150:782-786

Dukal H et al. (2015) New-born females show higher stress- and genotype-independent methylation of SLC6A4 than males Borderline personality disorder and emotion dysregulation 2:8 doi:10.1186/s40479-015-0029-6

Fydrich T, Sommer G, Brähler E (2007) Fragebogen zur sozialen Unterstützung : F-SozU. Hogrefe, Göttingen ; Bern ; Wien [u.a.]

Sarason IG, Johnson JH, Siegel JM (1978) Assessing the impact of life changes: development of the Life Experiences Survey Journal of consulting and clinical psychology 46:932-946

Sheehan DV et al. (1998) The Mini-International Neuropsychiatric Interview (M.I.N.I.): the development and validation of a structured diagnostic psychiatric interview for DSM-IV and ICD-10 The Journal of clinical psychiatry 59 Suppl 20:22-33;quiz 34-57

Spielberger CD, Gorsuch RL, Lushene RE, Vagg PR, Jacobs GAE (1983) Manual for the State- Trait Anxiety Inventory. Consulting Psychologists Press, Palo Alto, CA

Wittchen HU, Boyer P (1998) Screening for anxiety disorders. Sensitivity and specificity of the Anxiety Screening Questionnaire (ASQ-15) The British journal of psychiatry Supplement:10-17

Yali AM, Lobel M (1999) Coping and distress in pregnancy: an investigation of medically high risk women Journal of psychosomatic obstetrics and gynaecology 20:39-52
